# Supplementary material for: Field-friendly serological tests for determination of M. leprae-specific antibodies
Source: PubMed Central journal article supplement (PMC5566372; doi:10.1038/s41598-017-07803-7), 2017-08-21
Supplement: 41598_2017_7803_MOESM1_ESM.pdf [file 41598_2017_7803_MOESM1_ESM.pdf]

**SUPPLEMENTARY INFORMATION**  
**FIELD-FRIENDLY SEROLOGICAL TESTS FOR DETERMINATION OF**  
***M. LEPRAE*-SPECIFIC ANTIBODIES**

**Anouk van Hooij\***, **Elisa M. Tjon Kon Fat▼**, **Susan J.F. van den Eeden\***,  
**Louis Wilson\***, **Moises Batista da Silva†**, **Claudio G. Salgado†**, **John S. Spencer¶**,  
**Paul L.A.M. Corstjens▼**, and **Annemieke Geluk\***

*\*Dept. of Infectious Diseases, ▼Dept. Molecular Cell Biology and Dept. Reumatology, Leiden University Medical Center, The Netherlands and ¶Dept. of Microbiology, Immunology and Pathology, Colorado State University, Fort Collins, USA. †Laboratório de Dermato-Imunologia, Instituto de Ciências Biológicas, Universidade Federal do Pará, Marituba, Pará, Brazil.*

**RUNNING TITLE:** User-friendly test for anti-PGL-I detection

**KEYWORDS:** immune-monitoring, lateral flow assay, leprosy, PGL-I, serology, user-friendly, rapid test

**CORRESPONDENCE TO:**

Anouk van Hooij, Dept. of Infectious Diseases, LUMC  
PO Box 9600, 2300 RC Leiden, The Netherlands  
Tel: +31-71-526-3844; E-mail: [A.van\\_Hooij@lumc.nl](mailto:A.van_Hooij@lumc.nl)

**Supplementary Figure S1: Heatmap of ELISA, UCP-LFA and Gold-LFA test results per cohort.**

Heatmap showing the positive test results (green) for ELISA (OD450-background >0.200), UCP-LFA (ratio >0.29) and Gold-LFA (visual score >0.5) for the Philippine, Bangladeshi and Brazilian cohort. The bacterial index (BI) is shown if assessed (BI+ = green; BI- = orange). Values range from 0-2,605 for ELISA, 0-31 for the UCP-LFA and from 0-4 for the Gold -LFA. MB = multibacillary, PB = paucibacillary, NEC = non-endemic controls, HHC = healthy household contacts, HHC&BCG = BCG-vaccinated healthy household contacts, EC = endemic controls.



**Supplementary Figure S2: Heatmap of UCP-LFA and Gold-LFA nonconcordant test results in leprosy patients.**

Heatmap showing test results of leprosy patients (MB and PB) from the Philippine and Bangladeshi cohort with a positive result in either the UCP-LFA or Gold-LFA. Positive test results were divided into two groups, weak positives (light green; UCP-LFA : 0,29-0,4 ; Gold-LFA : 0,5) and strong positives (dark green; UCP-LFA  $\geq$  0,4; Gold-LFA  $\geq$ 1). MB = multibacillary, PB = paucibacillary.



|      | <b>ELISA</b> | <b>UCP-LFA</b> | <b>Gold-LFA</b> |
|------|--------------|----------------|-----------------|
| TB1  | 0,024        | 0,09           | 0               |
| TB2  | 0,05         | 0,06           | 0               |
| TB3  | 0,055        | 0,24           | 0               |
| TB4  | 0,042        | 0,00           | 0               |
| TB5  | 0,082        | 0,11           | 0               |
| TB6  | 0,046        | 0,10           | 0               |
| TB7  | 0,071        | 0,11           | 0               |
| TB8  | 0,061        | 0,24           | 0               |
| TB9  | 0,055        | 0,20           | 0               |
| TB10 | 0,024        | 0,04           | 0               |
| TB11 | 0,025        | 0,11           | 0               |
| TB12 | 0,009        | 0,03           | 0               |
| TB13 | 0,005        | 0,10           | 0               |
| TB14 | 0,022        | 0,14           | 0               |
| TB15 | 0,09         | 0,16           | 0               |
| TB16 | 0,004        | 0,01           | 0               |
| TB17 | 0,033        | 0,13           | 0               |
| TB18 | 0,034        | 0,08           | 0               |

**Supplementary Table S1: Evaluation of ELISA, UCP-LFA and Gold-LFA in patients with active tuberculosis.**

Test results for 18 patients with active tuberculosis in PGL-I ELISA (threshold for positivity:  $OD_{450}$ -background  $>0.200$ ), UCP-LFA (threshold for positivity :ratio  $>0.29$ ) and Gold-LFA (threshold for positivity: visual score  $>0.5$ ).
